# Supplementary material for: Impact of the DREAMS interventions on educational attainment among adolescent girls and young women: Causal analysis of a prospective cohort in urban Kenya
Source: PLoS One. 2021 Aug 12;16(8):e0255165. doi: 10.1371/journal.pone.0255165 (PMC8360512; doi:10.1371/journal.pone.0255165)
Supplement: S1 Table — (XLSX) [file pone.0255165.s008.xlsx]

## Sheet: Version 1
	S1 Table: Another title: Retention in the cohort in 2019, according to key individual and household characteristics measured at time of cohort enrolment
	S1 Table : Proportions of AGYW aged 15-22 years retained in the study vs those lost to follow up at endline (2019), by AGYW characteristics
	S1 Table : Retention in the cohort in 2019 among AGYW aged 15-22 years, according to key individual and household characteristics measured at time of cohort enrolment
		Overall				15-17 years				18-22 years
	Chatacteristics at enrolment	n	N	%	p-value	n	N	%	p-value	n	N	%	p-value
	Invited status at baseline
	Not invited	400	545	73.4		185	225	82.2		215	320	67.2
	Invited	452	536	84.3	<0.001	279	322	86.6	0.156	173	214	80.8	0.001
	Age, pregnany and marital status
	15-17 years	464	547	84.8		464	547	84.8
	18-22:never married, never pregnant	201	253	79.4						201	253	79.4
	18-22:never married, ever pregnant	40	56	71.4	<0.001					40	56	71.4	0.005
	18-19:ever married and ever pregnant	32	53	60.4						32	53	60.4
	20-22:ever married and ever pregnant	115	172	66.9						115	172	66.9
	DSS study site
	Korogocho	513	617	83.1		282	317	89		231	300	77
	Viwandani	339	464	73.1	<0.001	182	230	79.1	0.002	157	234	67.1	0.011
	Highest level completed
	Less than primary grade 8	89	121	73.6		63	79	79.7		26	42	61.9
	Primary grade 8 or more	763	960	79.5	0.133	401	468	85.7	0.174	362	492	73.6	0.103
	Orphanhood status
	Not an orphan	663	744	89.1		372	417	89.2		291	327	89
	Single/double orphan	189	209	90.4	0.584	92	99	92.9	0.269	97	110	88.2	0.816
	Food insecure
	No	564	730	77.3		302	362	83.4		262	368	71.2
	Yes	288	351	82.1	0.071	162	185	87.6	0.201	126	166	75.9	0.259
	Self assessed household poverty
	Very poor	115	138	83.3		58	65	89.2		57	73	78.1
	Moderately poor	672	859	78.2	0.374	368	436	84.4	0.544	304	423	71.9	0.532
	Not poor	65	84	77.4		38	46	82.6		27	38	71.1
	Wealth quantile
	Poor	303	361	83.9		174	191	91.1		129	170	75.9
	Medium	277	360	76.9	0.013	156	196	79.6	0.006	121	164	73.8	0.31
	Wealthy	272	360	75.6		134	160	83.8		138	200	69
	How long have you stayed in the DSA*
	Since birth	446	516	86.4		269	302	89.1		177	214	82.7
	0-5 years	173	290	59.7	<0.001	62	90	68.9	<0.001	111	200	55.5	<0.001
	6-10 years	110	130	84.6		66	80	82.5		44	50	88
	10+ years	123	145	84.8		67	75	89.3		56	70	80
	Highest educational level of the household head
	None/incomplete primary	202	237	85.2		120	132	90.9		82	105	78.1
	Incomplete secondary	285	367	77.7	<0.001	149	185	80.5	0.07	136	182	74.7	0.004
	Complete secondary/tertiary	252	346	72.8		126	151	83.4		126	195	64.6
	Don't know	113	130	86.9		69	79	87.3		44	51	86.3
	Currently in school
	No	312	455	68.6		67	88	76.1		245	367	66.8
	Yes	540	626	86.3	<0.001	397	459	86.5	0.013	143	167	85.6	<0.001
	*DSA - Demographic Surveillance Area

## Sheet: S1_Table
	S1 Table : Number and proportions of AGYW aged 15-22 years retained in the study vs those lost to follow up at endline (2019), by AGYW characteristics.
		Overall			15-17 years			18-22 years
	Chatacteristics at enrolment	n/Na	%	p-valueb	n/Na	%	p-valueb	n/Na	%	p-valueb
	Invited status at baseline
	Not invited	400/545	73.4		185/225	82.2		215/320	67.2
	Invited	452/536	84.3	<0.001	279/322	86.6	0.156	173/214	80.8	0.001
	Age, pregnany and marital status
	15-17 years	464/547	84.8		464/547	84.8
	18-22:never married, never pregnant	201/253	79.4					201/253	79.4
	18-22:never married, ever pregnant	40/56	71.4	<0.001				40/56	71.4	0.005
	18-19:ever married and ever pregnant	32/53	60.4					32/53	60.4
	20-22:ever married and ever pregnant	115/172	66.9					115/172	66.9
	DSS study site
	Korogocho	513/617	83.1		282/317	89		231/300	77
	Viwandani	339/464	73.1	<0.001	182/230	79.1	0.002	157/234	67.1	0.011
	Highest level completed
	Less than primary grade 8	89/121	73.6		63/79	79.7		26/42	61.9
	Primary grade 8 or more	763/960	79.5	0.133	401/468	85.7	0.174	362/492	73.6	0.103
	Orphanhood status
	Not an orphan	663/744	89.1		372/417	89.2		291/327	89
	Single/double orphan	189/209	90.4	0.584	92/99	92.9	0.269	97/110	88.2	0.816
	Food insecure
	No	564/730	77.3		302/362	83.4		262/368	71.2
	Yes	288/351	82.1	0.071	162/185	87.6	0.201	126/166	75.9	0.259
	Self assessed household poverty
	Very poor	115/138	83.3		58/65	89.2		57/73	78.1
	Moderately poor	672/859	78.2	0.374	368/436	84.4	0.544	304/423	71.9	0.532
	Not poor	65/84	77.4		38/46	82.6		27/38	71.1
	Wealth quantile
	Poor	303/361	83.9		174/191	91.1		129/170	75.9
	Medium	277/360	76.9	0.013	156/196	79.6	0.006	121/164	73.8	0.31
	Wealthy	272/360	75.6		134/160	83.8		138/200	69
	How long have you stayed in the DSAc
	Since birth	446/516	86.4		269/302	89.1		177/214	82.7
	0-5 years	173/290	59.7	<0.001	62/90	68.9	<0.001	111/200	55.5	<0.001
	6-10 years	110/130	84.6		66/80	82.5		44/50	88
	10+ years	123/145	84.8		67/75	89.3		56/70	80
	Highest educational level of the household head
	None/incomplete primary	202/237	85.2		120/132	90.9		82/105	78.1
	Incomplete secondary	285/367	77.7	<0.001	149/185	80.5	0.07	136/182	74.7	0.004
	Complete secondary/tertiary	252/346	72.8		126/151	83.4		126/195	64.6
	Don't know	113/130	86.9		69/79	87.3		44/51	86.3
	Currently in school
	No	312/455	68.6		67/88	76.1		245/367	66.8
	Yes	540/626	86.3	<0.001	397/459	86.5	0.013	143/167	85.6	<0.001
	an is number retained in 2019, while N is number enrolled in 2017; bchi-square p-values comparing those retained vs those not retained; cDSA - Demographic Surveillance Area
