# Supplementary material for: Impact of the DREAMS interventions on educational attainment among adolescent girls and young women: Causal analysis of a prospective cohort in urban Kenya
Source: PLoS One. 2021 Aug 12;16(8):e0255165. doi: 10.1371/journal.pone.0255165 (PMC8360512; doi:10.1371/journal.pone.0255165)
Supplement: S2 Table — (XLSX) [file pone.0255165.s009.xlsx]

## Sheet: S2_Table
	S2 Table: Number of interventions accessed by age group, schooling status at baseline and invitation to DREAMS
			Number of primary interventions received by 2019
			0		1		2		3		Total
			n	%	n	%	n	%	n	%	N
	Among 10-14 year olds	Not invited by 2018	23	20.2	57	50	27	23.7	7	6.1	114
		Invited by 2018	15	3.9	50	13.2	135	35.5	180	47.4	380
			0		1		2		≥3 (out of 7)		Total
			n	%	n	%	n	%	n	%	N
	Among 15-17 year olds	Not invited by 2018	11	11.6	28	29.5	27	28.4	29	30.5	95
		Invited by 2018	2	0.5	18	4.9	32	8.7	317	85.9	369
	Among 18-22 year olds	Not invited by 2018	12	9.3	31	24	27	20.9	59	45.7	129
		Invited by 2018	2	0.8	6	2.3	27	10.4	224	86.5	259
	Among those out of school at baseline (15-22 year olds)	Not invited by 2018	6	5.5	29	26.6	19	17.4	55	50.5	109
		Invited by 2018	2	1	8	3.9	24	11.8	169	83.3	203
	Among those in school at baseline (15-22 year olds)	Not invited by 2018	17	14.8	30	26.1	35	30.4	33	28.7	115
		Invited by 2018	2	0.5	16	3.8	35	8.2	372	87.5	425
