# Supplementary material for: Impact of the DREAMS interventions on educational attainment among adolescent girls and young women: Causal analysis of a prospective cohort in urban Kenya
Source: PLoS One. 2021 Aug 12;16(8):e0255165. doi: 10.1371/journal.pone.0255165 (PMC8360512; doi:10.1371/journal.pone.0255165)
Supplement: S4 Table — (XLSX) [file pone.0255165.s011.xlsx]

## Sheet: S4 Table
	S4 Table. Results from sensitivity analysis for associations between DREAMS and educational attainment
	(i) Based on invitation to DREAMS only	% outcome in total study population (95% CIa)	Estimated % outcome if no DREAMS (95% CI)	Estimated % outcome if all get DREAMS (95% CI)	% Difference (95% CI)
	Full Sample
	Overall all age range
	PS-regression adjustment	82.63	79.2 (72.9−84.3)	83.4 (80.3−86.5)	4.2 (-1.8 to 11.1)
	PS-stratification	82.63	77.8 (72.2−82.8)	83.9 (79.2−86.2)	6.0 (0.7−11.7)
	PS-inverse probability of treatment IPTW weighting	82.63	79.2 (74.1−84.0)	83.3 (80.4−86.4)	4.2 (-1.1 to 9.8)
	Multivariable outcome regression model	82.63	80.4 (71.9−84.7)	83.7 (81.0−86.7)	3.3 (-1.1 to 22.9)
	Age 15-17 years at cohort enrolment
	PS-regression adjustment	89.01	84.9 (76.6−91.2)	89.9 (86.5−92.9)	5.1 (-2.4 to 13.7)
	Multivariable outcome regression model	89.01	87.5 (81.6−93.0)	89.4 (85.8−92.3)	1.9 (-4.2 to 8.1)
	Age 18-22 years at cohort enrolment
	PS-regression adjustment	75	72.5 (64.3−80.4)	75.6 (70.2−81.2)	3.1 (-6.5 to 13.2)
	Multivariable outcome regression model	75	71.8 (55.8−79.1)	76.9 (71.7−82.0)	5.1 (-2.4 to 21.7)
	Sub-group analysis among those out of school at baseline
	Overall all age range
	PS-regression adjustment	57.37	53.1 (44.1−62.8)	60.5 (53.9−66.7)	7.4 (-4.0 to 18.8)
	PS-stratification	57.37	51.3 (42.2−60.7)	60.9 (53.7−67.5)	9.6 (-2.0 to 20.2)
	PS-inverse probability of treatment IPTW weighting	57.37	52.7 (44.1−61.3)	60.5 (53.9−67.1)	7.9 (-3.1 to 17.9)
	Multivariable outcome regression model	57.37	52.8 (43.7−62.8)	60.1 (54.1−66.8)	7.3 (-3.04 to 17.8)
	Age 15-17 years at cohort enrolment
	PS-regression adjustment	38.81	24.3 (8.0−45.9)	44.7 (30.7−60.4)	20.4 (-2.8 to 42.6)
	Multivariable outcome regression model	38.81	26.6 (9.5−47.0)	44.1 (30.1−58.2)	17.5 (-7.8 to 38.7)
	Age 18-22 years at cohort enrolment
	PS-regression adjustment	62.45	61.0 (50.5−71.0)	64.8 (57.2−71.9)	3.8 (-8.3 to 17.2)
	Multivariable outcome regression model	62.45	60.0 (49.7−70.7)	64.5 (57.7−72.0)	4.5 (-8.2 to 15.8)
	Sub-group analysis among those in school at baselineb
	PS-regression adjustment	97.2	98.3 (94.4−99.5)	97.3 (95.9−98.7)	-1.0 (-3.5 to 3.3)
	PS-stratification	97.2	97.8 (94.2−100.0)	97.3 (95.6−98.8)	-0.5 (-3.4 to 3.3)
	PS-inverse probability of treatment IPTW weighting	97.2	98.0 (95.3−100.0)	97.3 (95.6−98.9)	-0.8 (-3.4 to 2.4)
	Sub-group analysis among those who had not completed lower secondary at baseline (post-hoc)b
	PS-regression adjustment	63.3	62.8 (56.0−81.0)	63.5 (58.5−68.8)	0.7 (-17.6 to 7.3)
	PS-stratification	63.3	58.5 (51.1−66.9)	65.3 (59.8−70.2)	6.8 (-2.2 to 14.4)
	PS-inverse probability of treatment IPTW weighting	63.3	61.7 (54.6−68.3)	63.5 (58.4−68.2)	1.8 (-4.1 to 7.9)
	aCI - Confidence Interval; bMultivariable outcome regression model not conducted because of reduced sample size.
	(ii) Per protocol analysis (based on invitation to DREAMS and also the number of primary interventions accessed): Full sample
		Overall	15-17 years	18-22 years
	Estimated % Outcome if no DREAMS (95% CI)	79.2 (72.9−84.3)	84.9 (76.6−91.2)	72.5 (64.3−80.41)
	Estimated % Outcome if DREAMS by 2018 & <3 primary interventionsa (95% CI)	83.1 (75.3−90.7)	88.8 (80.1−96.4)	76.3 (60.6−88.5)
	Risk Difference (95% CI)	3.9 (-4.7 to 14.6)	3.9 (-6.8 to 14.6)	3.8 (-12.5 to 20.1)
	Estimated % Outcome if DREAMS by 2018 & 3+ primary interventionsa (95% CI)	83.2 (79.8−86.7)	90.2 (86.5−93.2)	74.9 (68.7−81.1)
	Risk Difference (95% CI)	4.0 (-2.0 to 10.9)	5.3 (-2.2 to 14.0)	2.4 (-7.1 to 12.5)
	aPrimary interventions are: social asset building, HIV & violence prevention; condom education and demonstration; HIV testing services; Pre-Exposure Prophylaxis; contraception mix and financial capability training.
